1 **The cryo-EM structure of the bacterial flagellum cap**  
2 **complex suggests a molecular mechanism for filament**  
3 **elongation.**

4  
5  
6

7 Natalie S. Al-Otaibi<sup>1</sup>, Aidan J. Taylor<sup>1</sup>, Daniel P. Farrell<sup>2</sup>, Svetomir B. Tzokov<sup>1</sup>, Frank  
8 DiMaio<sup>2</sup>, David J. Kelly<sup>1\*</sup> and Julien R.C. Bergeron<sup>1\*</sup>.

9

10 <sup>1</sup> Department of Molecular Biology and Biotechnology, the University of Sheffield, Sheffield, UK

11 <sup>2</sup> Department of Biochemistry, University of Washington, Seattle, USA

12

13 \* [j.bergeron@sheffield.ac.uk](mailto:j.bergeron@sheffield.ac.uk) and [d.kelly@sheffield.ac.uk](mailto:d.kelly@sheffield.ac.uk)

14

15

16

17

18 **Abstract:**

19

20

21 The bacterial flagellum is a remarkable molecular motor, present at the surface of  
22 many bacteria, whose primary function is to allow motility through the rotation of a long  
23 filament protruding from the bacterial cell. A cap complex, consisting of an oligomeric  
24 assembly of the protein FliD, is localized at the tip of the flagellum, and is essential for  
25 filament assembly, as well as adherence to surfaces in some bacteria. However, the  
26 structure of the intact cap complex, and the molecular basis for its interaction with the  
27 filament, remains elusive. Here we report the cryo-EM structure of the *Campylobacter*  
28 *jejuni* cap complex. This structure reveals that FliD is pentameric, with the N-terminal  
29 region of the protomer forming an unexpected extensive set of contacts across several  
30 subunits, that contribute to FliD oligomerization. We also demonstrate that the native  
31 *C. jejuni* flagellum filament is 11-stranded and propose a molecular model for the  
32 filament-cap interaction.

33

## 34 **Introduction**

35

36

37 The bacterial flagellum is a macromolecular motor that rotates and acts as a propeller  
38 in many bacteria. It is associated with virulence in many human pathogens including  
39 *Salmonella*, enteropathogenic *Escherichia coli*, *Campylobacter*, and *Helicobacter*  
40 species<sup>1,2</sup>. The flagellum is composed of > 25 different proteins, and consists of three  
41 main regions: the basal body acts as an anchor in the bacterial membrane, and  
42 includes the apparatuses for rotation and protein secretion; the hook forms a junction  
43 which protrudes from the outer membrane; and the filament, consisting of multiple  
44 repeats of a single protein (flagellin), forms the propeller<sup>3</sup>. The filament, that can be >  
45 20  $\mu\text{m}$  in length, is topped by a cap complex, that consists of several copies of the  
46 protein FliD. This complex initially attaches to the hook-filament junction, and using a  
47 yet unknown mechanism, assists in building the filament<sup>4</sup>.

48 Low-resolution cryo-EM studies of the cap complex in *Salmonella enterica* have  
49 suggested that it consists of five copies of FliD (also known as HAP2), forming a  
50 “stool”-shaped complex with a core “head” domain and five flexible “leg” domains, that  
51 interact with the growing end of the filament<sup>5,6</sup>. Crystal structures of the FliD head  
52 domain have been reported for several species, and revealed a range of  
53 crystallographic symmetries, from tetramers in *Serratia marscecens* (FliD<sub>sm</sub>),  
54 pentamers in *S. enterica* (FliD<sub>se</sub>) and hexamers in *E. coli* (FliD<sub>ec</sub>) and *Pseudomonas*.  
55 *aeruginosa* (FliD<sub>pa</sub>)<sup>7-10</sup>. This observation led to the hypothesis that the cap complex  
56 can have a different, species-specific oligomeric states.

57

58 The flagellar filament has been studied extensively by cryo-EM, and its high-resolution  
59 structure has been reported in a range of bacteria, including *Bacillus subtilis*, *P.*  
60 *aeruginosa* and *S. enterica*. In all of these, the filament was shown to consist of 11  
61 proto-filaments<sup>11,12</sup>. However, a low-resolution cryo-EM study of the *C. jejuni* flagellar  
62 filament suggested the presence of 7 protofilaments<sup>13</sup>. Taken together with the range  
63 of oligomeric states observed in the FliD crystal structures, these observations have  
64 led to a model where in different bacterial species, the cap complex has different  
65 oligomeric states (N), and in the corresponding filaments, the number of protofilaments  
66 is  $2N + 1$ <sup>7</sup>.

67 *Campylobacter jejuni* is a Gram-negative, spiral-shaped microaerophilic epsilon  
68 proteobacterium, colonizing the lower gastrointestinal (GI) tract of humans and poultry  
69 <sup>14</sup>. It is often the most common cause of bacterial gastroenteritis and can lead to  
70 severe sequelae such as Guillain-Barré (GBS) and Miller-Fisher syndromes (MFS) <sup>15</sup>.  
71 *C. jejuni* has two polar flagella located at each cell pole, which have an important  
72 function not only in motility, but are also responsible for adherence to surfaces, and  
73 for the secretion of virulence factor proteins <sup>15,16</sup>. FliD<sub>cj</sub> is the major antigen in *C.jejuni*  
74 and thus a target for vaccine design <sup>17–19</sup>.

75

76 In this study, we report the structure of the *C. jejuni* flagellar cap complex by cryo-EM.  
77 This structure demonstrates that FliD<sub>cj</sub> is pentameric, with an extensive set of contacts  
78 across several residues at the termini, that contribute to stabilizing the oligomeric  
79 state. We show that these interactions are essential for cell motility. We also observe  
80 that the full-length FliD protein for both *S. marcescens* (FliD<sub>sm</sub>) and *P. aeruginosa*  
81 (FliD<sub>pa</sub>) also form pentamers, with similar dimensions to that of FliD<sub>cj</sub>, indicating that  
82 the pentameric state of FliD within the cap complex is likely universal. Finally, we  
83 demonstrate that the native *C. jejuni* flagellum filament is 11-stranded, similar to other  
84 known flagellum filament structures. These observations allow us to propose a  
85 molecular model for the filament-cap interaction, and cap-mediated filament  
86 elongation.

87

88

## 89 **Results**

90

### 91 **Cryo-EM structure of the flagellum cap complex.**

92

93 Existing high-resolution structures of FliD have so far been limited to the head domain.  
94 We therefore sought to characterize the intact FliD protein. To that end, we purified  
95 full-length FliD from several species: *C. jejuni* (FliD<sub>cj</sub>), *P. aeruginosa* (FliD<sub>pa</sub>) and *S.*  
96 *marcescens* (FliD<sub>sm</sub>) (Figure S1a). Size-exclusion chromatography demonstrated that  
97 all three proteins form oligomeric assemblies (not shown). However, preliminary  
98 negative-stain analysis showed that while the complexes formed by FliD<sub>pa</sub> and FliD<sub>sm</sub>  
99 are heterogeneous (Figure S1b), FliD<sub>cj</sub> forms homogeneous complexes, suitable for  
100 structural characterization.

101 Next we used cryo-EM to determine the structure of FliD<sub>cj</sub>. The protein forms discrete  
102 particles in vitreous ice, and 2D classification confirms that it adopts the dumbbell  
103 shaped structure previously reported for FliD<sub>st</sub> (Figure S2a). In addition, a significant  
104 subset of particles adopted top-view orientations, with clear 5-fold symmetry. This  
105 allowed us to obtain a structure of the full complex, to 4.71 Å resolution (Figures S2b,  
106 S2e).

107 The FliD<sub>cj</sub> complex possesses an overall architecture similar to FliD<sub>sm</sub><sup>5,6</sup>, consisting of  
108 ten subunits, with two pentamers interacting in a “tail-to-tail” orientation, through the  
109 leg domains (Figure 1a). A pentamer is about 170 Å in height (the decamer is ~300 Å)  
110 and 130 Å in width with a 20 Å lumen (Figure 1c). We note however that the map  
111 shows a wide range of local resolution, with the leg domain well defined and with  
112 visible side-chains, while the head domain is much more poorly defined (Figure S2b).

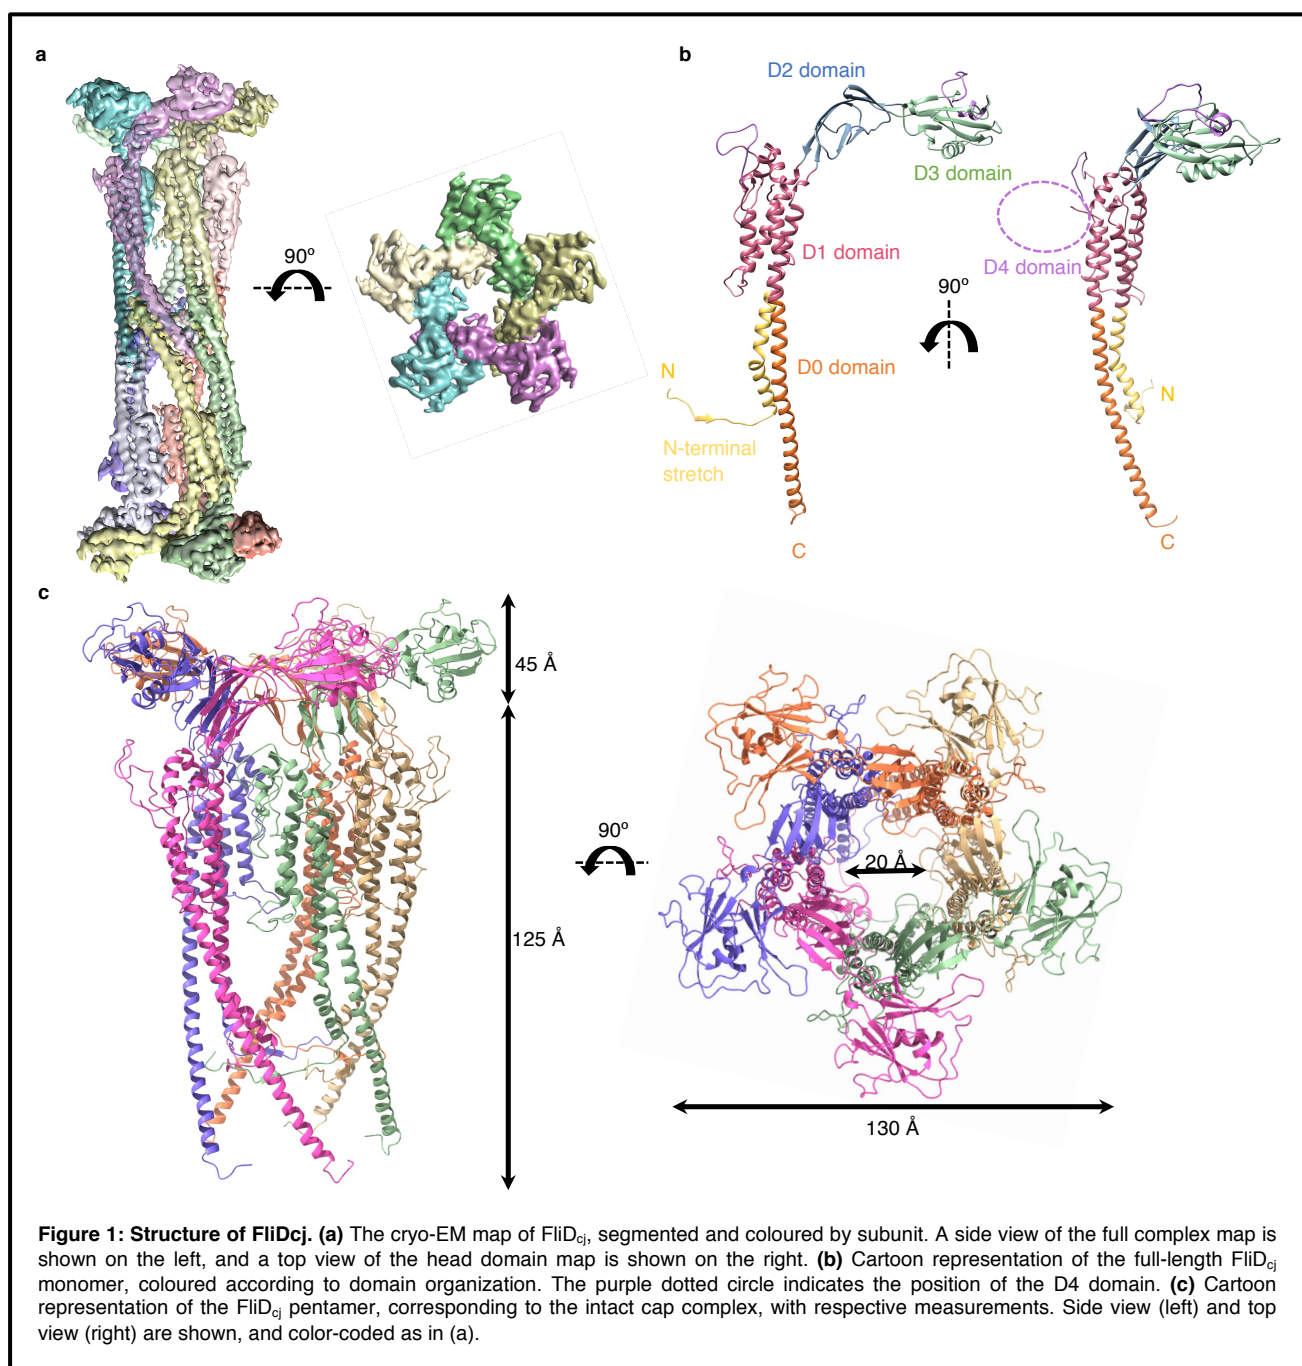

113 This suggests that the complex is dynamic, with a hinge between the leg and head  
114 domains. To address this, we therefore performed a focused refinement on the head  
115 domain only, leading to a map at 5.02 Å resolution for this domain (Figure S2c, S2e).  
116 Using this map, we were able to generate an atomic model for this region of FliD<sub>cj</sub>,  
117 based on the crystal structure of FliD<sub>ec</sub> (PDB ID: 5H5V)<sup>8</sup>. We then used the map of  
118 the full complex to build the atomic model for the leg domain *de novo* (Figure S2d, S2f,  
119 Table 1).

120

121 The FliD<sub>cj</sub> structure shows that the FliD protomer folds in on itself in a v-shape, which  
122 results in N and C termini next to each other in the leg domain. The overall architecture,  
123 as proposed previously, consists of a D0 domain formed by a long coiled coil,  
124 consisting of two helices located at the termini. A four-helix bundle forms the D1  
125 domain. Connected to the D0-D1 leg domains are D2-D3 domains, rich in anti-parallel  
126 β-sheets, forming the head (Figure 1b)<sup>7-9</sup>. This overall architecture is similar to that of  
127 the flagellin and hook, and in agreement with the previously reported structures of the  
128 FliD head domain<sup>20</sup>. Intriguingly, while it was predicted that the D0 domain consists  
129 of a two-helix coiled-coil, as present in the flagellin and hook, our structure reveals that  
130 the N-terminal 17 residues are extended into a stretch that folds under and behind the  
131 monomer, interacting with the preceding subunit via a short β-strand. As a  
132 consequence, the C-terminal helix of the coiled-coil is not partnered with the N-  
133 terminus, but instead interacts with that of another molecule through hydrophobic  
134 interactions, forming the pentamer-to-pentamer interface. This intriguing architecture  
135 likely explains the strong tendency of FliD to form tail-to-tail complexes during  
136 isolation, as observed in FliD<sub>se</sub><sup>6</sup> and FliD<sub>cj</sub> (this study).

137 We also note that FliD<sub>cj</sub> possesses a long insert within the D1 helix bundle, not present  
138 in other orthologues (Figure S3a). Secondary structure prediction indicates that this  
139 insert is likely globular (not shown), leading to the hypothesis that it forms an additional  
140 domain, termed D4. This type of domain insertion is not unusual, and has been  
141 observed in other FliD orthologues, as well as in flagellin and hook proteins<sup>10,11,21,22</sup>.  
142 In our FliD<sub>cj</sub> map, we were able to observe density for this domain (Fig S3b), however  
143 it is at very low resolution, and did not allow us to build an atomic model. This suggests  
144 that the D4 domain is flexible. Indeed, further 3D classification revealed at least 4  
145 distinct positions for this domain (Figure S3c). The role of this D4 domain is not known,

146 but we postulate that it could be related to FliD<sub>cj</sub>'s capacity to bind to heparin, a feature  
 147 involved in *C. jejuni* adherence but not observed in other FliD orthologues<sup>4</sup>.

|                                | <b>FliD<sub>cj</sub></b>                  | <b>Filament</b>                              |
|--------------------------------|-------------------------------------------|----------------------------------------------|
| <i>Data collection</i>         |                                           |                                              |
| Microscope                     | Titan Krios                               | Tecnai Arctica                               |
| Voltage (kV)                   | 300                                       | 200                                          |
| Camera                         | K2 Summit                                 | Falcon III                                   |
| Magnification                  | 36232                                     | 53000                                        |
| Pixel size (Å)                 | 1.38                                      | 2.03                                         |
| Defocus range (μm)             | -1.0 to -2.6                              | -0.8 to -2.0                                 |
| Total dose (eÅ <sup>-2</sup> ) | 41                                        | 45                                           |
| Number of micrographs          | 1223                                      | 100                                          |
| Total particles used           | 55967                                     | 71828                                        |
| <i>Model Composition</i>       |                                           |                                              |
| Non-hydrogen atoms             | 37320                                     |                                              |
| Protein Residues               | 4880                                      |                                              |
| <i>Refinement</i>              |                                           |                                              |
| Resolution                     | 4.71 Å (full map)<br>5.02 Å (head domain) | 8.6 Å (symmetrical)<br>27.2 Å (asymmetrical) |
| Mask CC                        | 0.77                                      |                                              |
| Volume CC                      | 0.77                                      |                                              |
| <i>R.m.s. deviations</i>       |                                           |                                              |
| Bond lengths (Å)               | 0.005                                     |                                              |
| Bond angles (°)                | 0.543                                     |                                              |
| <i>Validation</i>              |                                           |                                              |
| MolProbity score               | 1.85                                      |                                              |
| Clashscore                     | 8.36                                      |                                              |
| Poor rotamers (%)              | 0.00                                      |                                              |
| <i>Ramachandran plot</i>       |                                           |                                              |
| Favoured (%)                   | 94.13                                     |                                              |
| Allowed (%)                    | 5.87                                      |                                              |
| Disallowed (%)                 | 0.00                                      |                                              |

**Table 1: Maps and atomic model statistics**

## 150 **Comparison with other FliD orthologues.**

151

152 Our cryo-EM structure of FliD<sub>cj</sub> is the first high-resolution structure of an intact FliD  
153 protein. Nonetheless the crystal structure of the head domain, corresponding to  
154 domains D2-D3, has been reported for a range of species, including *S. enterica*, *P.*  
155 *aeruginosa*, *E. coli*, *S. marcescens*, and *H. pylori*<sup>6-10</sup>. In all orthologues, the structure  
156 is very similar, with RMSB values ranging from 1.5 Å to 2.5 Å to that of FliD<sub>cj</sub> (Figure  
157 2a). In the *E. coli* orthologue, domain D1 was also present in the structure. It consists  
158 of a 4-helix bundle, and this structure is very similar to that of FliD<sub>cj</sub>, with a RMSD of  
159 1.5 Å between the two structures. Nonetheless, we note that the position of D1 relative  
160 to that of D2-D3 is dramatically different in FliD<sub>ec</sub> compared to FliD<sub>cj</sub> (Figure S4a). This  
161 suggests that the hinge between D1 and D2 is flexible, as supported by our focused  
162 refinement result.

163 In our cryo-EM map, FliD forms a pentameric architecture, consistent with the low-  
164 resolution cryo-EM structure of FliD<sub>se</sub>, with a similar overall architecture consisting of  
165 two pentamers in a head-to-tail arrangement. In contrast, crystal structures of the head  
166 domains from FliD in several species reported a range of oligomeric states, including  
167 tetramer (FliD<sub>sm</sub>), pentamer (FliD<sub>se</sub>) and hexamers (FliD<sub>pa</sub> and FliD<sub>ec</sub>)<sup>7-9</sup>. When  
168 comparing the dimensions of these structures, the diameters of all complexes are  
169 similar, around ~140 Å. However, the dimension of the lumen differs significantly  
170 between structures, with FliD<sub>cj</sub> and FliD<sub>se</sub> having a central lumen of ~20 Å, while FliD<sub>pa</sub>  
171 and FliD<sub>ec</sub> have a lumen of ~50 Å and ~40 Å respectively, and FliD<sub>sm</sub> a ~15 Å lumen  
172 (Figure 2b). Even in the case of FliD<sub>se</sub>, which crystallized as a pentamer, while the  
173 overall dimensions are similar to that of the head domains of the FliD<sub>cj</sub> pentamer, in  
174 the *E. coli* orthologue the pentamer is flattened compared to that of FliD<sub>cj</sub> (Figure S4b).  
175 Based on our structure, we hypothesize that there is a large degree of plasticity in the  
176 interface between the D2-D3 domains of adjacent molecules, and therefore in the  
177 absence of D0, a range of interfaces can be trapped in the crystal contacts. We  
178 propose that the additional contacts formed by the N-terminal stretch are essential for  
179 FliD to adopt its true oligomeric state.

180

181 To verify this, we investigated the oligomeric state of full-length FliD<sub>sm</sub> and FliD<sub>pa</sub>, the  
182 head domains of which crystallized as tetramers and hexamers, respectively, by  
183 negative stain TEM. As mentioned above, these proteins do not form uniform

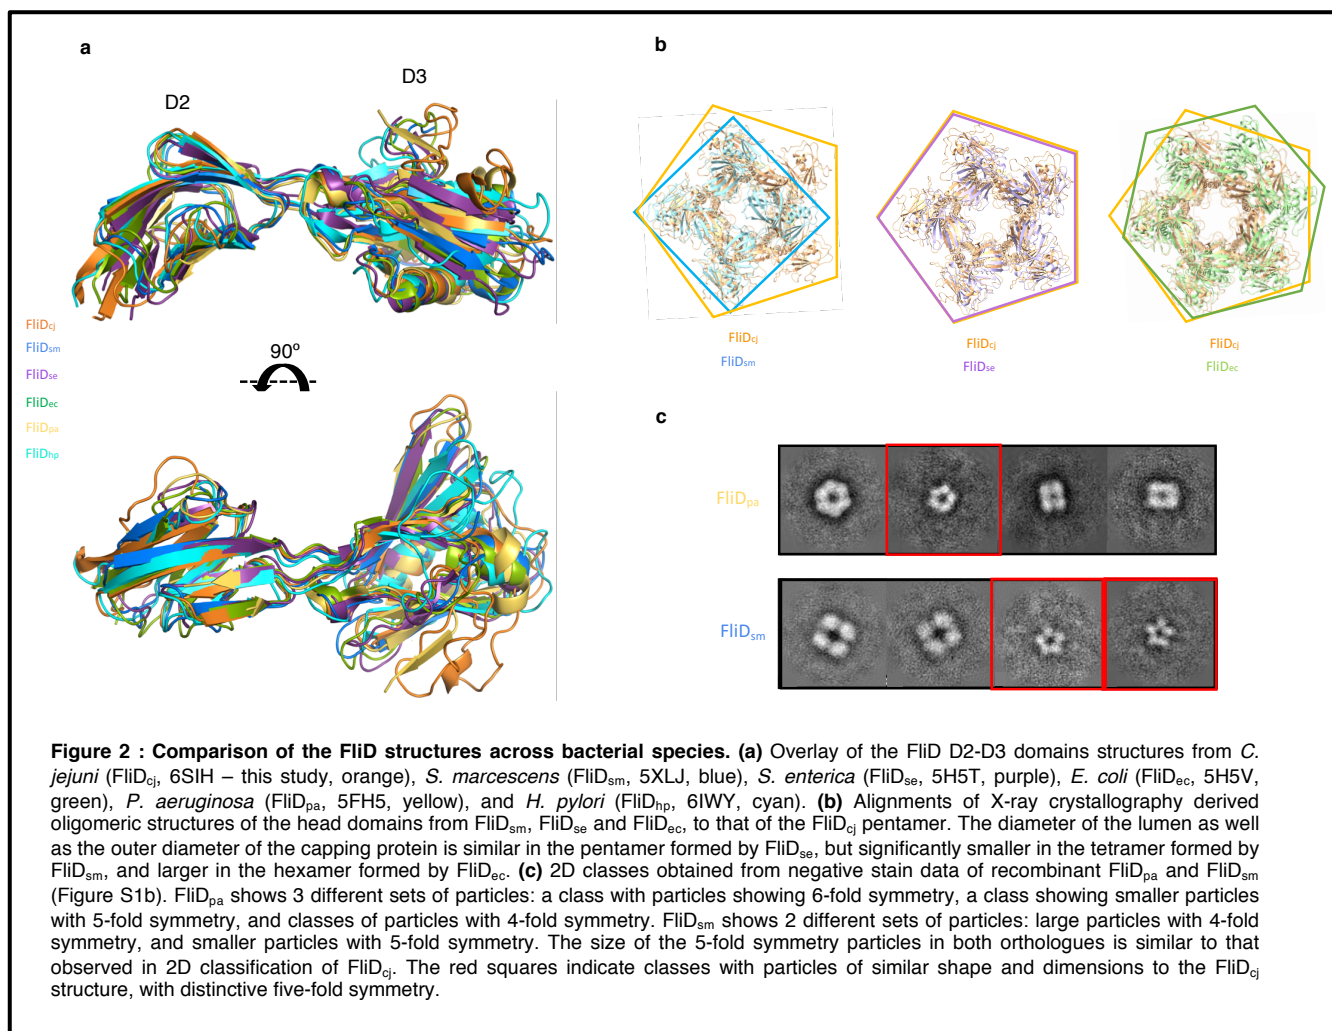

184 complexes (Figure S1b). Nonetheless, we noted that the majority of the particles  
 185 appeared as top views, which allowed us to perform preliminary 2D classification to  
 186 determine their lateral symmetry. This revealed that both orthologues form pentamers  
 187 with similar dimensions to that of FliD<sub>cj</sub> (Figure 2c). However, in the FliD<sub>pa</sub> sample we  
 188 observed additional particles with 6-fold and 4-fold symmetry, while in the FliD<sub>sm</sub>  
 189 sample there was a large percentage of particles with 4-fold symmetry. The  
 190 dimensions of the particles in those 2D classes are significantly larger than the FliD  
 191 pentamer, and therefore we could not conclude if these correspond to alternative  
 192 oligomeric species, or to other negative stain artifacts and/or non-specific aggregates.  
 193 However, the presence of pentamers with similar dimensions to that of FliD supports  
 194 the hypothesis that the native architecture of the cap complex is a FliD pentamer, with  
 195 contacts at the N-terminus required for FliD to adopt its true oligomeric state.

196

197

198 **Hydrophobic interactions in the D0 domain are required for forming functional**  
 199 **filaments.**

200



201 As mentioned above, our structural characterization of the cap complex indicates an  
 202 unusual architecture of the N-terminus, which forms a stretch that wraps around and  
 203 forms contacts with two adjacent subunits, through hydrophobic contacts (Figure 3a).  
 204 In particular, Residues Leu 9 and Phe 11 are buried within a pocket formed by Trp 614  
 205 and Tyr 617, located in the C-terminus of the adjacent molecule. This is of particular  
 206 interest since it was shown that the C-terminus contributes to the oligomerization of  
 207 FliD and interaction with its chaperone<sup>23</sup>. We also note that both the N- and C- termini  
 208 of FliD are highly conserved across species, with mainly aromatic side-chains present  
 209 in all orthologues in the aforementioned positions.

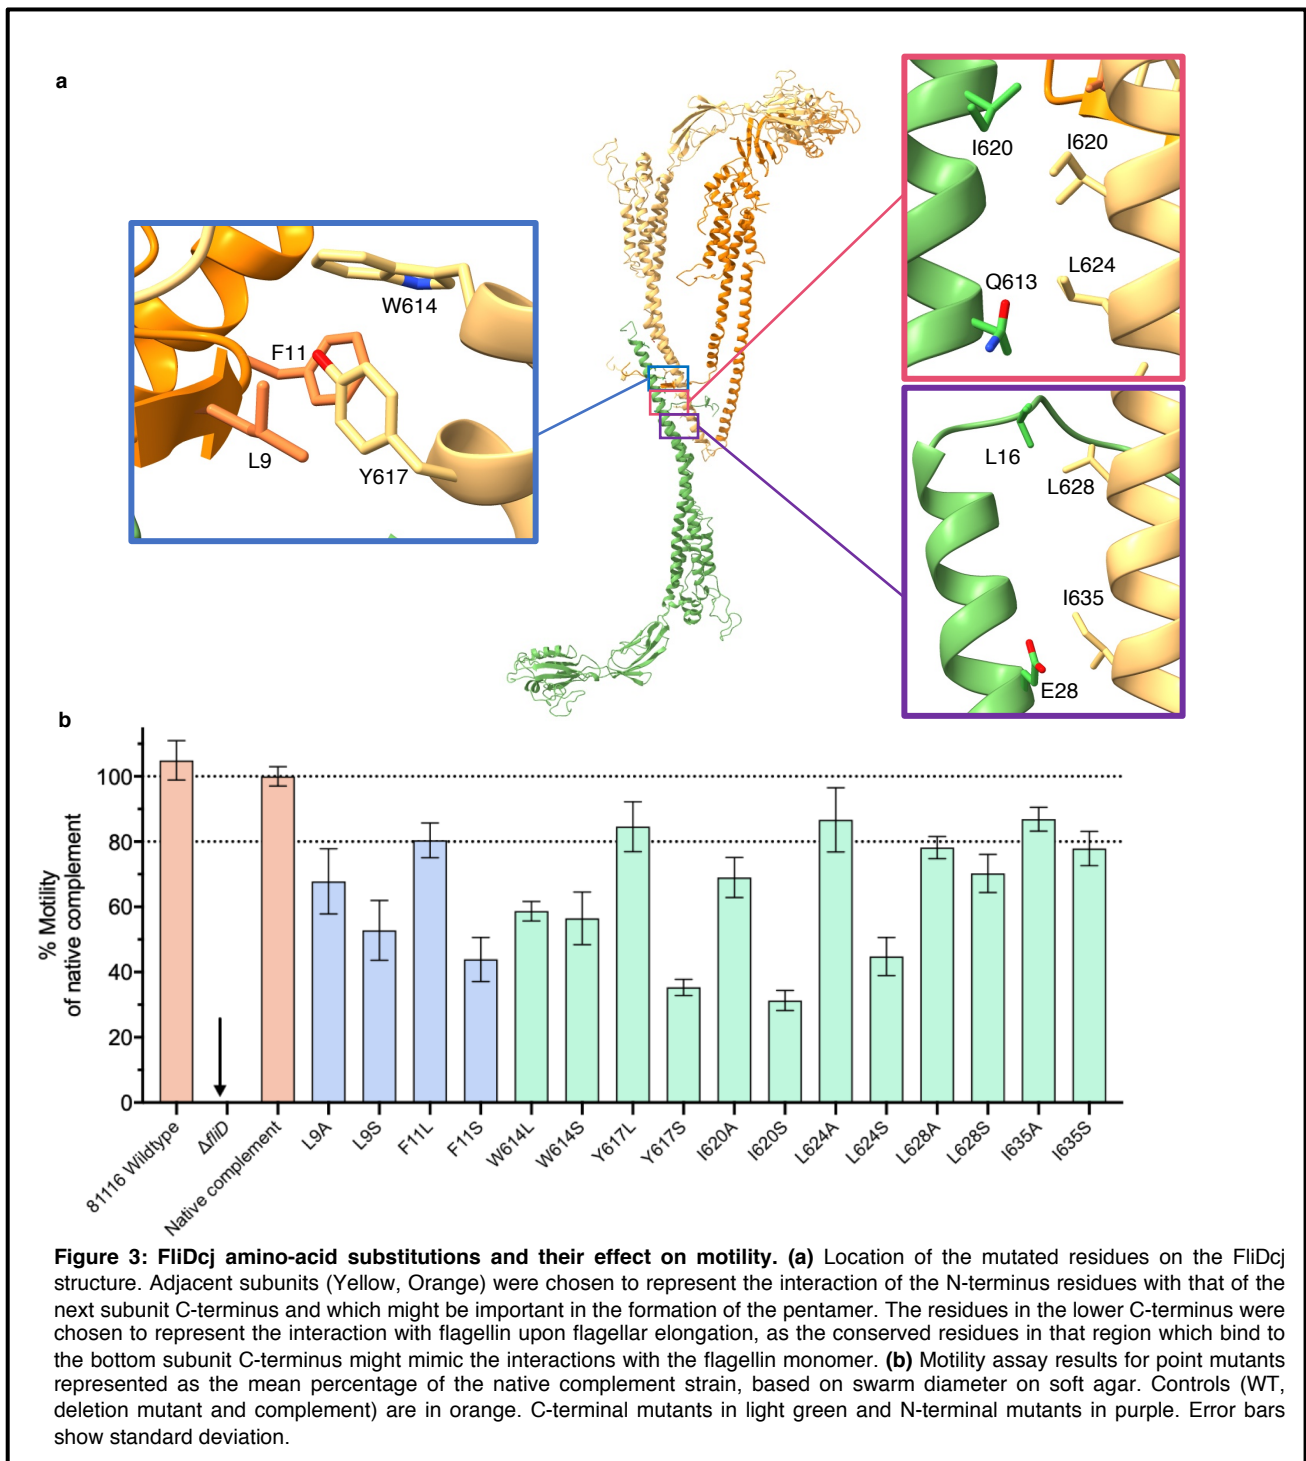

**Figure 3: FliDcj amino-acid substitutions and their effect on motility. (a)** Location of the mutated residues on the FliDcj structure. Adjacent subunits (Yellow, Orange) were chosen to represent the interaction of the N-terminus residues with that of the next subunit C-terminus and which might be important in the formation of the pentamer. The residues in the lower C-terminus were chosen to represent the interaction with flagellin upon flagellar elongation, as the conserved residues in that region which bind to the bottom subunit C-terminus might mimic the interactions with the flagellin monomer. **(b)** Motility assay results for point mutants represented as the mean percentage of the native complement strain, based on swarm diameter on soft agar. Controls (WT, deletion mutant and complement) are in orange. C-terminal mutants in light green and N-terminal mutants in purple. Error bars show standard deviation.

210

211 To confirm the role of these residues in FliD function, we engineered a *C. jejuni fliD*  
212 knockout strain ( $\Delta fliD$ ), leading to a loss of motility in a soft agar swarm assay.  
213 Accordingly, no filament was observed in this strain (Figure S5a). Genetic  
214 complementation by expressing the *fliD* gene at a distal site on the chromosome fully  
215 rescued motility (Figure 3b, S5a), and we exploited this to engineer point mutations in  
216 the aforementioned residues to assess their impact on motility.

217 Mutation of Leu 9, Phe 11, Trp 614 or Trp 617 significantly reduced motility, up to 40%  
218 for mutations to polar residues (F11S, W614S, L9S or Y617S) (Figure 3b). This  
219 confirms that the hydrophobic properties of these residues are critical for motility,  
220 suggesting that the interaction formed by the N-terminal stretch contributes to FliD  
221 function. To verify if motility was affected because the aforementioned mutations  
222 prevented filament assembly, we visualized the corresponding bacteria by TEM. All of  
223 the mutations still led to bacteria with assembled filaments, of length similar to that of  
224 WT bacteria (Figure S5b), demonstrating that the corresponding FliD proteins are still  
225 able to promote filament elongation. However, we noted that the filaments are much  
226 more brittle in the mutants, with between 60 and 80% of filaments found unattached  
227 to the bacterial cell, versus  $\sim 20\%$  in the WT bacteria (Figure S5c). We also note that  
228 the N-terminal  $\sim 20$  residue stretch corresponds to the secretion signal in flagellar  
229 filaments of *S. enterica*, so potentially a similar signal exists for FliD to be secreted  
230 through the flagellum T3SS<sup>24</sup>. The observation that in the mutants described above,  
231 the filament is still formed, is a strong confirmation that these mutations did not  
232 interfere with FliD secretion, but rather with its function to promote filament elongation.  
233 The second set of interactions observed in the D0 domain, is formed between the C-  
234 terminus of FliD in the pentamer-to-pentamer interface (Figure 3a). Evidence from  
235 tomography, as well as other biochemical data, indicate that this interaction is not  
236 physiological<sup>5,25–27</sup>. However, since it is observed in both FliD<sub>cj</sub> and FliD<sub>se</sub>, we  
237 postulated that it mimics the interaction between FliD and the filament. To verify this,  
238 we engineered a series of mutations in the residues forming this interface (Leu 628,  
239 Ile 635, Leu 624 and Ile 620) and characterized their impact on motility as described  
240 above (Figure 3b). Mutating these residues impacted motility, however the effect is  
241 less pronounced than the mutants involved in the N-terminal stretch interaction, with  
242 the exception of I620S and L624S mutations. We propose that this is because the

243 overall hydrophobic propensity, rather than specific contribution of each amino acid,  
244 is the critical element of this region of the protein.

245

246

### 247 **A structural model of the *C. jejuni* filament.**

248

249 Current Cryo-EM structures of various flagellar filaments have demonstrated that they  
250 consist of 11 protofilaments, formed by a single protein, the flagellin<sup>11</sup>. The flagellin  
251 consists of four domains D0-D3, and can adopt two conformations, termed L and R,  
252 leading to two alternative filament structures, left-handed and right-handed,  
253 respectively. *C. jejuni* possesses two flagellin homologues, FlaA and FlaB, that are ~  
254 95% identical to each other, with both required for the formation of fully functional  
255 filaments. FlaA and FlaB are highly similar to other flagellins (Figure S6a), except for  
256 an ~70 amino acid insert in D2 that likely consists of a globular insert, as observed in  
257 several flagellin orthologues<sup>11</sup>. Surprisingly, a previously published EM structure of  
258 the *C.jejuni* filament had reported a 7 protofilament arrangement<sup>13</sup>. However, this  
259 structure was obtained from a FlaA G508A mutant, in the absence of FlaB, and is at  
260 low resolution. It is therefore not clear if this was an artifact and/or wrong interpretation  
261 of the data, or if the *C. jejuni* filament indeed possesses a different architecture to other  
262 species.

263

264 To reconcile this, we sought to determine the structure of the native *C. jejuni* filament,  
265 directly from wild type cells (Figure 4a). To avoid biases due to symmetry, we initially  
266 performed a reconstruction without any helical symmetry applied. This map clearly  
267 possessed 11-fold symmetry (Figure S6b), despite the low resolution (~27 Å, figure  
268 S6c). This demonstrates that the *C. jejuni* flagellar filament consists of 11  
269 protofilaments with a lumen of ~25-30 Å and outer diameter of ~200 Å, similar to that  
270 of other bacterial species. We therefore refined the map further by applying helical  
271 symmetry, with a 65.4° twist and 7.25 Å rise, which allowed us to reach ~8.6 Å  
272 resolution (Figure S6c). In this map the central D0-D1 domains are well resolved, with  
273 the density for helices clearly visible (Figure 4b). The density for domains D2 and D3  
274 is visible, but less well resolved. The fact that we can only reach limited resolution is  
275 perhaps not surprising, since we likely have a combination of L and R conformations  
276 for the flagellin.

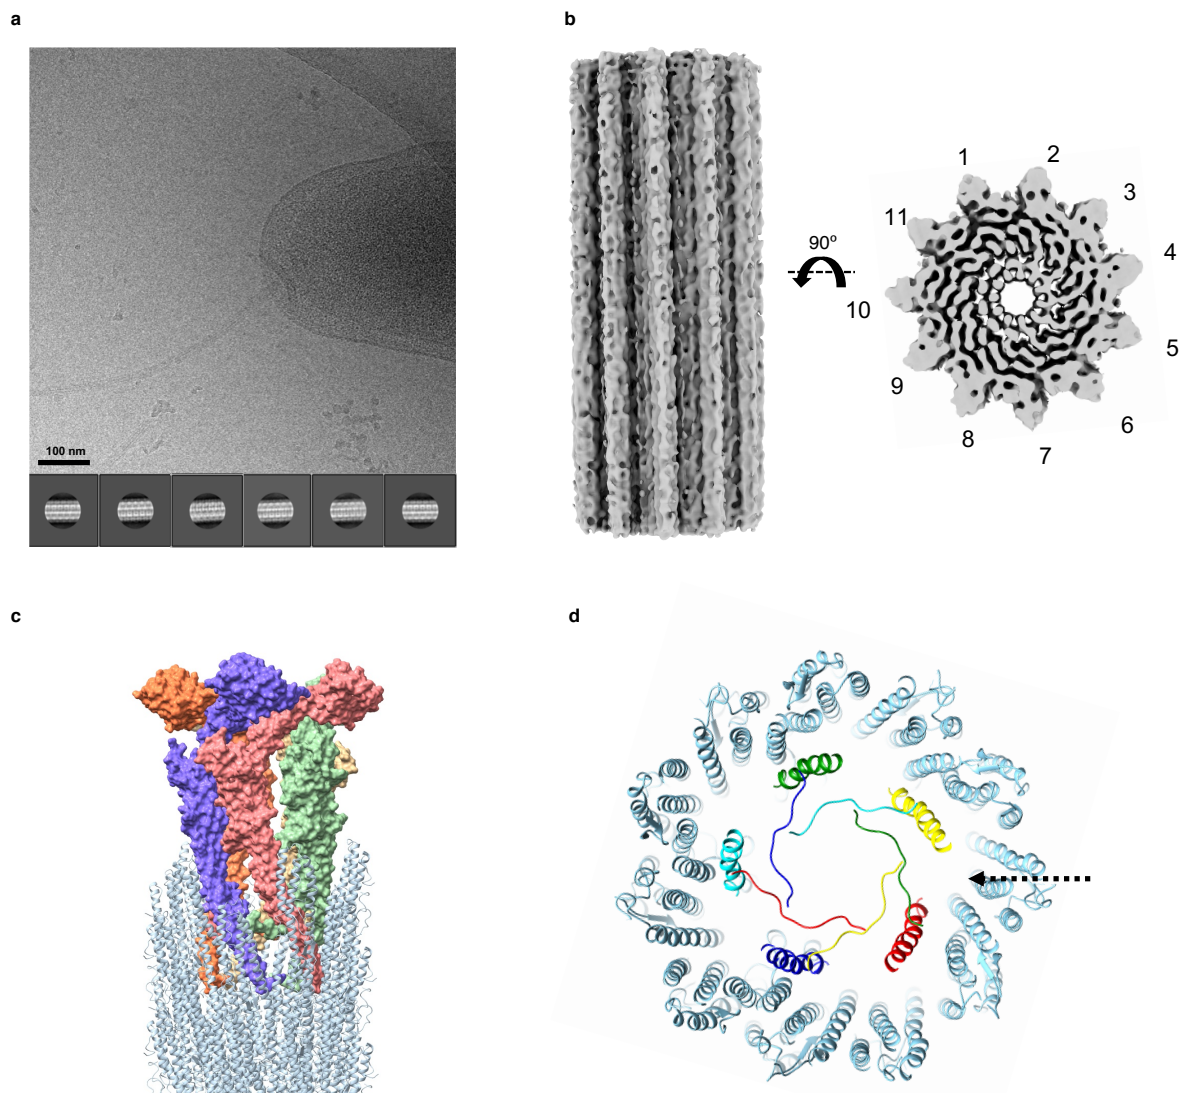

**Figure 4: Structural characterization of the native *C. jejuni* flagella.** (a) Cryo-electron micrograph of the native *C. jejuni* flagella, used for the 3D reconstruction. 2D classes, generated from ~71828 particles, are shown below. (b) EM map of the native flagellum, with helical symmetry applied, to 8.6 Å resolution. A side view is shown to the left, and top view to the right. (c) Structural model of the filament-cap complex, with FliD in surface representation and coloured as in Figure 1, and the filament atomic model in cyan. (d) Close-up view of the various FliD-flagellin interfaces in the model shown in (c). Both termini, with the N-terminal stretch and the C-terminal helix, are shown for each FliD protomer.

277

278 Based on this, we used the previously published structure of the *P. aeruginosa*  
 279 filament (PDB ID: 5WK6), to position the cap complex within the filament structure.  
 280 This allowed us to propose a model for FliD-flagellin interaction (Figure 4c). In this  
 281 model, the C-terminus of FliD forms broadly non-specific, hydrophobic contacts with  
 282 exposed regions of the filament, similar to flagellin-flagellin interactions (Figures 4c  
 283 and 4d). A gap between adjacent FliD molecules, on the side of the leg domain, is  
 284 positioned in a suitable location for the insertion of a flagellin molecule and is the likely  
 285 site of exit for nascent molecules (Figure 4d). This however remains to be verified  
 286 experimentally.

287

288

## 289 **Discussion**

290

291 In previous studies, evidence suggesting different stoichiometries for the flagellum  
292 filament and/or cap complex in different species was based on low-resolution cryo-EM  
293 structures, and crystallographic symmetries of truncated proteins. Here we largely  
294 resolve this conflicting evidence, by demonstrating that FliD adopts a pentameric  
295 stoichiometry in a range of species, and that the filament of *C. jejuni* is 11-stranded,  
296 and not 7-stranded as reported previously. We can therefore conclude that the  
297 stoichiometry of these proteins is conserved across species, with a 11-to-5 asymmetry  
298 between these two different regions of the bacterial flagellum. Our structure of the  
299 intact cap complex, supported by mutagenesis studies, suggests that the FliD C-  
300 terminal domain interaction with the opposite pentamer in the decameric complex  
301 mimics that of the FliD interaction with the filament. We hypothesize that exposed  
302 hydrophobic residues, both on the D0 domain of flagellin molecules and in the C-  
303 terminus of FliD, act as a chaperonin-like environment to promote the folding and  
304 insertion of new flagellins <sup>28,29</sup>.

305

306 Based on the results reported in this study, we propose a universal mechanism for  
307 cap-mediated filament elongation, as illustrated in figure 5. The FliD cap pentamer fits  
308 into the flagellum filament, through interactions between D0 of flagellins and the C-  
309 terminus of FliD. Because of the symmetry mismatch, this interaction is not present on  
310 one side of the cap complex. New flagellin molecules are secreted through the  
311 filament, and ultimately enter a chamber inside the cap complex (1). The flagellin then  
312 exits this cavity through a lateral opening, where the location of the next flagellin  
313 insertion site is positioned (2). The four other cavities are sterically blocked by the  
314 flagellum filament. There, exposed hydrophobic residues act as a chaperone, and  
315 promote flagellin folding in its insertion site (3). The folding of the new flagellin  
316 protomer leads to dislodging of the cap complex, that rotates by  $\sim 35^\circ$  (4), thus  
317 positioning an adjacent cavity of the cap complex close to the next flagellin insertion  
318 site (Figure 5).

319 We note that previous studies, based on low-resolution tomography data, have  
320 suggested that the D0 domain of FliD might be dynamic, with the leg domains opening  
321 and closing to promote filament elongation <sup>5,9,26</sup>. Our structure of the cap complex does  
322 not support this model, as we show that the N-terminal stretch of FliD is essential for

323 filament elongation and maintains the leg domains in a rigid position. Our data  
324 supports an alternative mechanism, which had been proposed previously, whereby  
325 the cap complex acts as a rigid cog that rotates during flagellum elongation<sup>8</sup>. Further  
326 experiments to characterize the flagellum-cap complex at high resolution will be  
327 required to confirm this model.  
328

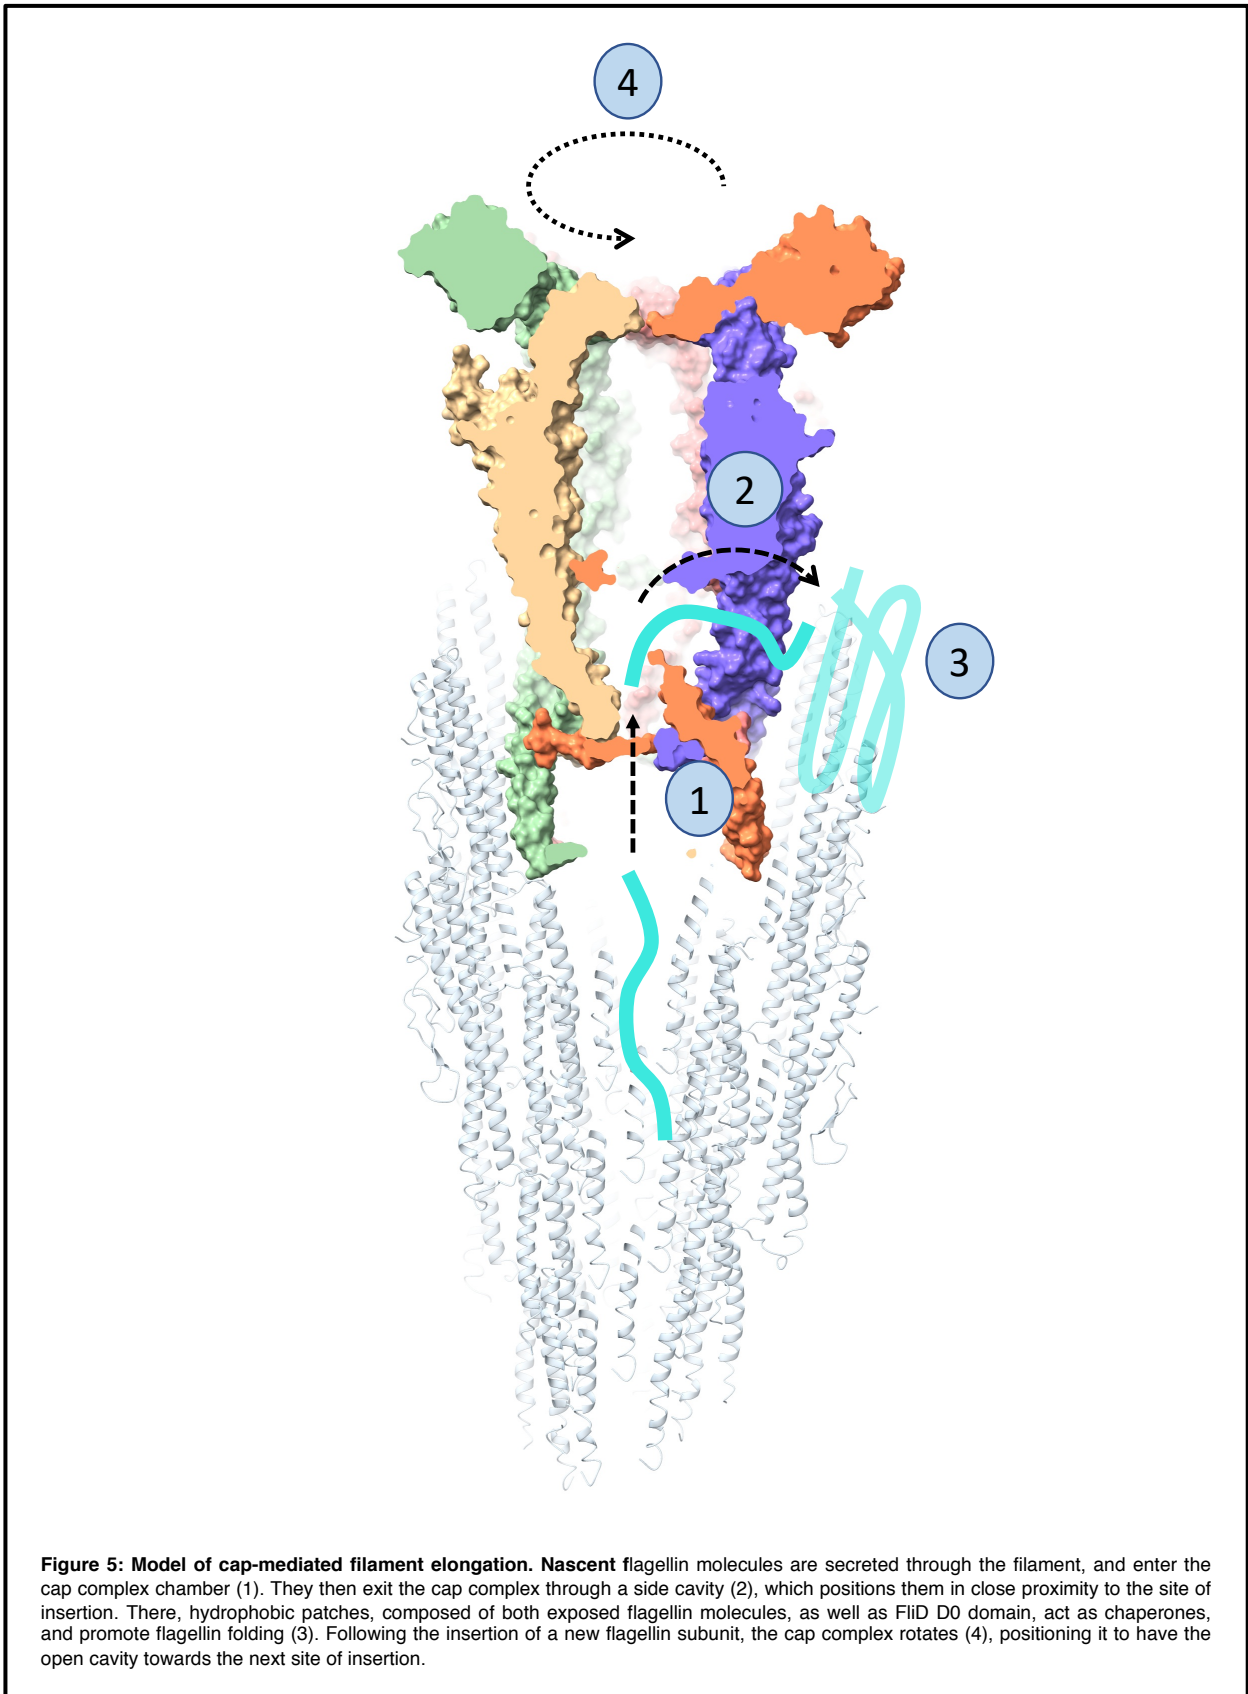

329 In conclusion, we report the cryo-EM structure of the flagellum cap complex, and  
330 demonstrate that FliD across multiple species (FliD<sub>sm</sub>, FliD<sub>pa</sub> and FliD<sub>se</sub>) forms  
331 pentameric complexes. We show that the interface between opposite D0 leg domains  
332 in the FliD decamer complex is essential for cell motility and formation of a functional  
333 filament, and therefore likely plays a role in FliD-filament interactions. We also  
334 demonstrate that the *C. jejuni* flagellar filament possesses the same architecture as  
335 that of other species. Taken together, these results allow us to propose a universal  
336 model for cap-filament interaction as well as propose a mechanism for cap-mediated  
337 filament elongation.

338

339

## 340 **Materials and Methods:**

341

### 342 **Protein Expression and purification.**

343

344 The genes coding for FliD<sub>cj</sub>, FliD<sub>sm</sub> and FliD<sub>pa</sub>, codon-optimized for expression in *E.*  
345 *coli*, were synthesized (BioBasic) and sub-cloned into pET28a (Novagen).  
346 Recombinant proteins were expressed in *E. coli* BL21-CodonPlus(DE3)-RIL cells  
347 containing the corresponding plasmids. For FliD<sub>cj</sub>, transformants were grown in LB  
348 medium at 37 °C until they reached log phase, and expression was induced by the  
349 addition of 1mM IPTG overnight at 20 °C. For both FliD<sub>pa</sub> and FliD<sub>sm</sub>, expression was  
350 auto-induced in ZYM-5052<sup>30</sup> media at 20 °C overnight. For all three proteins, cells  
351 were collected by centrifugation, resuspended in 50 mM HEPES 150 mM NaCl pH 7  
352 and sonicated. The lysate was centrifuged at 14 000g at 4 °C for 45 minutes. The  
353 supernatants were applied onto a 5 ml HisPure™ Ni-NTA resin (ThermoScientific)  
354 gravity-based column equilibrated with 50 mM HEPES 150 mM NaCl pH 7 and eluted  
355 using a linear 20-500 mM Imidazole gradient. Fractions containing FliD were pooled  
356 and applied to a HiLoad Superdex 200 16/600 column (GE Healthcare) equilibrated  
357 with 50 mM HEPES 150 mM NaCl pH 7 for FliD<sub>cj</sub> and 50 mM Tris 150 mM NaCl pH 8  
358 for FliD<sub>pa</sub> and FliD<sub>sm</sub>.

359

360

### 361 **Negative-stain grid preparation and data collection.**

362

363 For negative-stain TEM experiments,  $\sim 5 \mu\text{l}$  of purified protein, or of cell culture in log  
364 phase, was applied onto glow-discharged, carbon-coated copper grids (Agar  
365 Scientific). After incubating the sample for  $\sim 2$  minutes at room temperature, the grids  
366 were rapidly washed in three successive drops of deionized water and then exposed  
367 to three successive drops of 0.75% uranyl formate solution. Images were recorded on  
368 a CM100 TEM (Phillips) equipped with a MSC 794 camera (Gatan) (FliD<sub>cj</sub> and *C. jejuni*  
369 cell cultures) or a Technai T12 Spirit TEM (Thermo Fisher) equipped with an Orius  
370 SC-1000 camera (Gatan). Datasets were manually acquired with a pixel size of 2.46  
371 Å/pix, and a defocus range from  $-0.8 \mu\text{m}$  to  $-2.0 \mu\text{m}$ . The micrographs were processed  
372 using cisTEM<sup>31</sup> package, with CTF parameters determined by CTFFIND4<sup>32</sup>.  
373 Approximately 3500 particles were picked for FliD<sub>sm</sub> and 2700 for FliD<sub>pa</sub> to generate  
374 representative two-dimensional (2D) class averages with 330 Å mask diameter. The  
375 point mutant flagella attachment was determined through imaging grids at 700x  
376 magnification at about 20 micrographs per mutant containing cell count from 30 to 100  
377 cells. The percentage of attachment was calculated as a proportion of the total flagella  
378 observed per mutant.

379

380

### 381 **Cryo-EM grid preparation and data collection.**

382

383 For the structural characterization of FliD<sub>cj</sub>, aliquots of (5  $\mu\text{l}$ ) of purified protein at a  
384 concentration of 1 mg ml<sup>-1</sup> was deposited onto glow-discharged C-flat holey carbon  
385 films 1.2/1.3 200 mesh (EMS). A Vitrobot Mark III (FEI) plunge-freezing device was  
386 used for freeze-plunging, using double-blotting<sup>33</sup> with a final blotting time of 6.5  
387 seconds. Cryo-EM data were collected with a Titan Krios TEM operated at 300 kV and  
388 equipped with an energy filter (Gatan GIF Quantum) and recorded on a K2 Summit  
389 direct electron detector (Gatan) operated in counting mode. 1223 micrographs were  
390 automatically acquired with the EPU software (Thermo Fisher), at a pixel size of 1.38  
391 /pix, using a total dose of 41 e<sup>-</sup> Å<sup>-2</sup> and with 40 frames per micrograph. The defocus  
392 range used for data collection was  $-1.0 \mu\text{m}$  to  $-2.6 \mu\text{m}$ .

393 For the structural characterization of the native *C. jejuni* filament, wild-type 81116  
394 strain cell culture grown to OD<sub>600</sub> = 5 was applied onto glow-discharged C-flat holey  
395 carbon films 2/2 200 mesh (EMS). A Leica EM GP (Leica) plunge-freezing device was  
396 used for freezing, with a 6 s blotting time. Cryo-EM data were collected on a Technai



397 Arctica TEM (Thermo Fisher) operated at 200 kV and equipped with a Falcon III  
398 camera. 100 micrographs were collected using the EPU software (Thermo Fisher) in  
399 linear mode, with a pixel size of 2.03 Å/pix, with a total dose of 45 e<sup>-</sup> Å<sup>-2</sup> and 1 frame  
400 per micrograph. The defocus range used for data collection was approximately -0.8 μm  
401 to -2.0 μm.

402

403

#### 404 **Cryo-EM image processing and reconstruction.**

405

406 For FliD<sub>cj</sub>, processing was done in RELION 2.0<sup>34</sup>. Motion correction was performed  
407 with MotionCor2<sup>35</sup>, with dose-weighting. CTF parameters were determined by  
408 CTFFIND4<sup>32</sup> software. Approximately 2000 particles were manually picked from  
409 selected micrographs to generate representative 2D class averages. These classes  
410 were used as templates for automated particle picking for the entire dataset. A total of  
411 130000 particles were picked and extracted using a 280 x 280 pixels box. After  
412 multiple rounds of 2D classification, 55967 particles from the best 2D classes were  
413 obtained and used to generate an initial model. Following further 3D classification and  
414 refinement with D5 symmetry, a final map to 4.71 Å resolution was generated, which  
415 was sharpened using PHENIX 1.13<sup>36</sup>. The leg domains were visibly at a higher  
416 resolution than the head domains, therefore a mask centering on the head domain  
417 was used for further refinement with C5 symmetry, leading to a map of the head  
418 domain to 5.02 Å resolution. Further 3D classification of the masked head domain was  
419 used to identify 4 different conformations of the D4 domain not resolved in the full map.  
420 For the native *C. jejuni* filament, processing was done in RELION 3.0<sup>34</sup>. Motion  
421 correction was performed with MotionCor2<sup>35</sup>, with dose-weighting. CTF parameters  
422 were determined by CTFFIND4<sup>32</sup>. Filaments were manually picked, and particles  
423 were extracted using a 7.6 Å rise and 300 pixel box leading to a set of 254041  
424 segments. Multiple rounds of 2D classification gave a final dataset of 71828 good  
425 particles which were used for 3D refinement, both with and without imposed helical  
426 symmetry. Without symmetry, the structure refined to 27.2 Å resolution, but when  
427 helical symmetry was applied, the final resolution after further classification and  
428 refinement was 8.6 Å, with a 65.4° twist and a 7.25 Å rise.

429

430

431 **Model building and refinement.**

432

433 For the D2-D3 domains, a homology model was generated with PHYRE2<sup>37</sup>, using  
434 the FliD<sub>ec</sub> crystal structure<sup>8</sup> (PDB:5H5V) as a template. These domains were fitted  
435 into the sharpened map in Chimera<sup>38</sup>. This model was subjected to iterative rounds  
436 of real-space refinement and building using PHENIX 1.16<sup>36</sup> and Coot<sup>39</sup> respectively.  
437 The N-terminal stretch was modeled with RosettaES<sup>40</sup>, and then the remaining  
438 missing loops were modeled using RosettaCM<sup>41</sup> guided by the electron density. The  
439 output model was refined once more in Coot to improve the geometry and delete any  
440 modelled residues in areas without electron density.

441

442

443 **Cultivation of *C. jejuni*.**

444

445 *C. jejuni* strain 81116 was grown on blood agar plates (Colombia base agar  
446 with 5% v/v defibrinated horse blood) in a microaerobic cabinet (Don Whitley, UK) at  
447 42°C with a controlled atmosphere of 10% v/v O<sub>2</sub>, 5% v/v CO<sub>2</sub> and 85% v/v N<sub>2</sub>. Where  
448 appropriate, the selective antibiotics kanamycin and chloramphenicol were added at  
449 50 µg/ml and 20 µg/ml, respectively.

450

451

452 **Construction of *fliD* deletion mutant and complemented strains.**

453

454 A *fliD* mutation vector was constructed using NEB HiFi DNA assembly method  
455 (E2621, New England Biolabs). Briefly, flanking regions of *fliD* were amplified from *C.*  
456 *jejuni* 81116 genomic DNA using primers fliDmutantF1-R2 (Table S1). These flanks  
457 were assembled into pGEM3ZF either side of a non-polar kanamycin resistance  
458 cassette, amplified from pJMK30 using primers KanF/R (Table S1). The final mutation  
459 vector was designed such that spontaneous double crossover with the *C. jejuni* 81116  
460 genome would result in the replacement of the majority of the open reading frame of  
461 *fliD* with the kanamycin resistance cassette, allowing a means of selection. For  
462 complementation of the mutant, *fliD* was amplified from *C. jejuni* 81116 genomic DNA  
463 using primers fliDcompF/R (Table S1). The amplified fragment was digested with  
464 BsmBI at sites incorporated into the primers and ligated into similarly digested pCmetK

465 plasmid, a complementation vector for *C. jejuni* incorporating flanking regions of the  
466 pseudo-gene region corresponding to *cj0046* in *C. jejuni* 11168 to allow insertion into  
467 the genome, a constitutive promoter from the *C. jejuni metK* gene to drive expression  
468 of *fliD*, and a chloramphenicol resistance cassette. To generate the strains, wildtype  
469 *C. jejuni* 81116 was first transformed with the *fliD* mutation vector by electroporation  
470 and colonies selected for kanamycin resistance on blood agar plates. The isolated  
471 mutant strain was then further transformed with the *fliD* complementation vector and  
472 selected for double kanamycin / chloramphenicol resistance.

473

474

### 475 **Construction of *fliD* point mutants in *C.jejuni*.**

476

477 Point mutations in *fliD* were constructed by site directed mutagenesis of the  
478 complementation vector using the KLD method (M0554, New England Biolabs).  
479 Briefly, the *fliD* complementation plasmid was amplified by PCR with divergent primers  
480 containing targeted nucleotide substitutions in the forward primer (listed in Table S2).  
481 An aliquot of the linear PCR product was treated with the KLD enzyme mix to  
482 circularise the mutated plasmid while degrading any residual template. The treated  
483 plasmids were transformed into *E. coli* DH5 $\alpha$  and transformants selected by  
484 chloramphenicol resistance. Plasmid was purified from multiple transformants and the  
485 *fliD* open reading frame was sequenced to ensure the correct substitution had been  
486 introduced without secondary mutations (LightRun sequencing, Eurofins EU). Point  
487 mutated complementation vectors were then transformed into the *C. jejuni fliD* mutant  
488 strain as above to generate the collection of point mutant strains.

489

490

### 491 **Motility assays.**

492

493 Overnight growth of *C. jejuni* on blood agar plates was harvested and  
494 resuspended in phosphate buffered saline to an optical density at 600 nm of 1.0. 0.5  
495  $\mu$ l aliquots were then injected into semi-solid agar plates (0.4 % w/v agar, 3.7 % w/v  
496 brain heart infusion) containing 5x10<sup>-3</sup> % triphenyl tetrazolium chloride, a redox dye  
497 which allows clear visual assessment of growth. The diameter of growth was  
498 measured after 16 hours of incubation.

499

500

501 **Data availability.**

502

503 The map for FliD<sub>cj</sub> is available at EMDB with accession code EMD-10210, and the  
504 atomic model is available in Protein Data Bank with accession code 6SIH. The map  
505 for the native filament is available at EMDB with accession code EMD-10244. All other  
506 data supporting the findings of this study are available from the corresponding authors  
507 upon request.

508

509

510 **References**

511

- 512 1. Erhardt, M. Strategies to Block Bacterial Pathogenesis by Interference with  
513 Motility and Chemotaxis. in *Current Topics in Microbiology and Immunology*  
514 (eds. Stadler, M. & Dersch, P.) 185–205 (Springer, Cham, 2016).  
515 doi:10.1007/82
- 516 2. Chaban, B., Hughes, H. V. & Beeby, M. The flagellum in bacterial pathogens:  
517 For motility and a whole lot more. *Semin. Cell Dev. Biol.* **46**, 91–103 (2015).
- 518 3. Rossez, Y., Wolfson, E. B., Holmes, A., Gally, D. L. & Holden, N. J. Bacterial  
519 flagella: twist and stick, or dodge across the kingdoms. *PLoS Pathog.* **11**,  
520 e1004483 (2015).
- 521 4. Freitag, C. M., Strijbis, K. & van Putten, J. P. M. Host cell binding of the  
522 flagellar tip protein of *Campylobacter jejuni*. *Cell. Microbiol.* **19**, 1–13 (2017).
- 523 5. Yonekura, K. *et al.* The Bacterial Flagellar Cap as the Rotary Promoter of  
524 Flagellin Self-Assembly. *Science (80-. ).* **290**, 2148–2152 (2000).
- 525 6. Maki-Yonekura, S., Yonekura, K. & Namba, K. Domain movements of HAP2 in  
526 the cap-filament complex formation and growth process of the bacterial  
527 flagellum. *Proc. Natl. Acad. Sci. U. S. A.* **100**, 15528–15533 (2003).
- 528 7. Cho, S. Y. *et al.* Tetrameric structure of the flagellar cap protein FliD from  
529 *Serratia marcescens*. *Biochem. Biophys. Res. Commun.* **489**, 63–69 (2017).
- 530 8. Song, W. S., Cho, S. Y., Hong, H. J., Park, S. C. & Yoon, S. Self-Oligomerizing  
531 Structure of the Flagellar Cap Protein FliD and Its Implication in Filament  
532 Assembly. *J. Mol. Biol.* **429**, 847–857 (2017).

- 533 9. Postel, S. *et al.* Bacterial flagellar capping proteins adopt diverse oligomeric  
534 states. *Elife* **5**, 1–20 (2016).
- 535 10. Cho, S. Y. *et al.* Structural analysis of the flagellar capping protein FliD from  
536 *Helicobacter pylori*. *Biochem. Biophys. Res. Commun.* **514**, 98–104 (2019).
- 537 11. Wang, F. *et al.* A structural model of flagellar filament switching across multiple  
538 bacterial species. *Nat. Commun.* **8**, 960 (2017).
- 539 12. Maki-Yonekura, S., Yonekura, K. & Namba, K. Conformational change of  
540 flagellin for polymorphic supercoiling of the flagellar filament. *Nat. Struct. Mol.*  
541 *Biol.* **17**, 417–422 (2010).
- 542 13. Galkin, V. E. *et al.* Divergence of Quaternary Structures Among Bacterial  
543 Flagellar Filaments. *Science (80-. )*. **320**, 382–385 (2008).
- 544 14. Dasti, J. I., Tareen, A. M., Lugert, R., Zautner, A. E. & Groß, U. *Campylobacter*  
545 *jejuni*: A brief overview on pathogenicity-associated factors and disease-  
546 mediating mechanisms. *Int. J. Med. Microbiol.* **300**, 205–211 (2010).
- 547 15. Poly, F. & Guerry, P. Pathogenesis of *Campylobacter* infection. *Curr. Opin.*  
548 *Gastroenterology* **24**, 27–31 (2008).
- 549 16. van Putten, J. P. M., Alphen, L. B. Van, Wo, M. M. S. M. & Zoete, M. R. De.  
550 Molecular Mechanisms of *Campylobacter* Infection. in (ed. Sasakawa, C.) **337**,  
551 197–229 (Springer-Verlag Berlin Heidelberg, 2009).
- 552 17. Yeh, H., Hiett, K. L., Line, J. E. & Seal, B. S. Characterization and antigenicity  
553 of recombinant *Campylobacter jejuni* flagellar capping protein FliD. 602–609  
554 (2014). doi:10.1099/jmm.0.060095-0
- 555 18. Stevens, M. P. Evaluation of flagellum-related proteins FliD and FspA as  
556 subunit vaccines against *Campylobacter jejuni* colonisation in chickens.  
557 *Vaccine* **34**, 1739–1743 (2016).
- 558 19. Ghasemi, A. *et al.* Immunization with recombinant FliD confers protection  
559 against *Helicobacter pylori* infection in mice. *Mol. Immunol.* **94**, 176–182  
560 (2018).
- 561 20. Imada, K. Bacterial flagellar axial structure and its construction. *Biophys. Rev.*  
562 **10**, 559–570 (2018).
- 563 21. Matsunami, H., Barker, C. S., Yoon, Y. H., Wolf, M. & Samatey, F. A.  
564 Complete structure of the bacterial flagellar hook reveals extensive set of  
565 stabilizing interactions. *Nat. Commun.* **7**, 1–10 (2016).
- 566 22. Horvath, P., Kato, T., Miyata, T. & Namba, K. Structure of *Salmonella* Flagellar

- 567 Hook Reveals Intermolecular Domain Interactions for the Universal Joint  
568 Function. *MDPI Biomol.* **9**, 1–13 (2019).
- 569 23. Kim, H. J., Yoo, W., Jin, K. S., Ryu, S. & Lee, H. H. The role of the FliD C-  
570 terminal domain in pentamer formation and interaction with FliT. *Sci. Rep.* **7**,  
571 1–11 (2017).
- 572 24. Kovács, N., Jankovics, H. & Vonderviszt, F. Deletion analysis of the flagellum-  
573 specific secretion signal in *Salmonella* flagellin. *FEBS Letters* **592**, 3074–3081  
574 (2018).
- 575 25. Furukawa, Y. *et al.* Interactions between bacterial flagellar axial proteins in  
576 their monomeric state in solution. *J. Mol. Biol.* **318**, 889–900 (2002).
- 577 26. Vonderviszt, F. *et al.* Mechanism of self-association and filament capping by  
578 flagellar HAP2. *J. Mol. Biol.* **284**, 1399–1416 (1998).
- 579 27. Maki, S., Vonderviszt, F., Furukawa, Y., Imada, K. & Namba, K. Plugging  
580 interactions of HAP2 pentamer into the distal end of flagellar filament revealed  
581 by electron microscopy. *J. Mol. Biol.* **277**, 771–777 (1998).
- 582 28. Motojima, F. How do chaperonins fold protein? *Biophys.* **11**, 93–102 (2015).
- 583 29. Xing, Q. *et al.* Structures of chaperone-substrate complexes docked onto the  
584 export gate in a type III secretion system. *Nat. Commun.* 1–9 (2018).  
585 doi:10.1038/s41467-018-04137-4
- 586 30. Studier, F. W. Protein production by auto-induction in high density shaking  
587 cultures. *Protein Expr. Purif.* **41**, 207–234 (2005).
- 588 31. Grant, T., Rohou, A. & Grigorieff, N. Cistem, user-friendly software for single-  
589 particle image processing. *Elife* **7**, 1–24 (2018).
- 590 32. Rohou, A. & Grigorieff, N. CTFFIND4: Fast and accurate defocus estimation  
591 from electron micrographs. *J. Struct. Biol.* **192**, 216–221 (2015).
- 592 33. Snijder, J. *et al.* Vitrification after multiple rounds of sample application and  
593 blotting improves particle density on cryo-electron microscopy grids. *J. Struct.*  
594 *Biol.* **198**, 38–42 (2017).
- 595 34. Scheres, S. H. W. RELION: Implementation of a Bayesian approach to cryo-  
596 EM structure determination. *J. Struct. Biol.* **180**, 519–530 (2012).
- 597 35. Zheng, S. Q. *et al.* MotionCor2: Anisotropic correction of beam-induced motion  
598 for improved cryo-electron microscopy. *Nat. Methods* **14**, 331–332 (2017).
- 599 36. Adams, P. D. *et al.* PHENIX: A comprehensive Python-based system for  
600 macromolecular structure solution. *Acta Crystallogr. Sect. D Biol. Crystallogr.*

- 601           **66**, 213–221 (2010).
- 602 37. Kelley, L. A., Mezulis, S., Yates, C. M., Wass, M. N. & Sternberg, M. J. E. The  
603 Phyre2 web portal for protein modeling, prediction and analysis. *Nat. Protoc.*  
604 **10**, 845–858 (2015).
- 605 38. Pettersen, E. F. *et al.* UCSF Chimera - A visualization system for exploratory  
606 research and analysis. *J. Comput. Chem.* **25**, 1605–1612 (2004).
- 607 39. Emsley, P., Lohkamp, B., Scott, W. G. & Cowtan, K. Features and  
608 development of Coot. *Acta Crystallogr. Sect. D Biol. Crystallogr.* **66**, 486–501  
609 (2010).
- 610 40. Frenz, B., Walls, A. C., Egelman, E. H., Veessler, D. & Di Maio, F. RosettaES:  
611 A sampling strategy enabling automated interpretation of difficult cryo-  
612 EMmaps. *Nat. Methods* **14**, 797–800 (2017).
- 613 41. Song, Y. *et al.* High-resolution comparative modeling with RosettaCM.  
614 *Structure* **21**, 1735–1742 (2013).

615

616

#### 617 **Acknowledgements:**

618

619 This work was funded by a UK Biotechnology and Biological Sciences Research  
620 Council (BBSRC) grant (BB/R009759/1) to J.R.C.B. N.S.A. was recipient of PhD  
621 scholarship from The Global Strategic Alliance at the University of Sheffield. A.J.T.  
622 was funded by a BBSRC grant (BB/R003491/1) to D.J.K. We thank the members of  
623 EM facility for their essential assistance and microscope access, and we acknowledge  
624 the members of Prof. Per Bullough's laboratory for fruitful discussions. Cryo-EM data  
625 for FliD<sub>cj</sub> was collected at the UK national Electron Bio-Imaging centre (eBIC), proposal  
626 EM19709-1. The *C.jejuni* filament data was collected at the University of Sheffield  
627 Electron Microscopy Facility.

628

629

#### 630 **Author contributions:**

631

632 N.S.A. and J.R.C.B. conceived the project and designed the structural experiments.  
633 A.J.T. and D.J.K. designed the *C. jejuni* cloning, mutagenesis and motility assays.  
634 N.S.A. performed the protein purification, Cryo-EM data collection and processing, as

635 well as the negative stain experiments. A.J.T. performed the *C. jejuni* mutagenesis  
636 and motility assays, together with N.S.A. S.T. provided assistance with data collection  
637 and setup of electron microscopy facility. D.F. and F.D. refined the FliDcj atomic model  
638 with Rosetta. All authors contributed to the writing and editing of the manuscript.

639

640

641 **Competing interests:** The authors declare no competing interests

642
